# Supplementary material
Source: publisher figshare collection journal article supplement (https://acs.figshare.com/ndownloader/files/5180890)
Supplement: Supplementary file 1 [file 5180890]

data_thboronos 

_publ_contact_author_name         'Moshe Kapon' 
_publ_contact_author_address   
;
Department of Chemistry, Technion-Israel Institute 
of Technology, Haifa, Israel 32000.
;
_publ_contact_author_email        'kapon@techunix.technion.ac.il'
_publ_requested_journal           
;
Journal of the American Chemical Society  
;                         
_publ_section_title               
;
Formation of Inclusion Organoactinide Complexes with Boron Containing
Macrocycles.  
;
_publ_author_name 
;
Eyal Barnea, Tamer Andrea, Moshe Kapon and Moris S. Eisen.
;       
_publ_author_address
;
Department of Chemistry and Institute of Catalysis, Science and 
Technology,Technion-Israel Institute of Technology, Haifa, Israel 32000.
; 
_audit_creation_method            SHELXL-97 
_chemical_name_systematic 
; 
 ? 
; 
_chemical_name_common             ? 
_chemical_melting_point           ? 
_chemical_formula_moiety          'C46 H40 B3 Li O13 Th, 1(C6 H6)' 
_chemical_formula_sum             'C52 H46 B3 Li O13 Th' 
_chemical_formula_weight          1150.30 
 
loop_ 
 _atom_type_symbol 
 _atom_type_description 
 _atom_type_scat_dispersion_real 
 _atom_type_scat_dispersion_imag 
 _atom_type_scat_source 
 'Th'  'Th'  -7.2400   8.8979 
 'International Tables Vol C Tables 4.2.6.8 and 6.1.1.4' 
 'B'  'B'   0.0013   0.0007 
 'International Tables Vol C Tables 4.2.6.8 and 6.1.1.4' 
 'C'  'C'   0.0033   0.0016 
 'International Tables Vol C Tables 4.2.6.8 and 6.1.1.4' 
 'H'  'H'   0.0000   0.0000 
 'International Tables Vol C Tables 4.2.6.8 and 6.1.1.4' 
 'O'  'O'   0.0106   0.0060 
 'International Tables Vol C Tables 4.2.6.8 and 6.1.1.4' 
 'Li'  'Li'  -0.0003   0.0001 
 'International Tables Vol C Tables 4.2.6.8 and 6.1.1.4' 
 
_symmetry_cell_setting            'monoclinic' 
_symmetry_space_group_name_H-M    'P21/n' 
_symmetry_space_group_name_Hall   '-P 2yn'  

loop_ 
 _symmetry_equiv_pos_as_xyz 
 'x, y, z' 
 '-x+1/2, y+1/2, -z+1/2' 
 '-x, -y, -z' 
 'x-1/2, -y-1/2, z-1/2' 
 
_cell_length_a                    17.1920(5) 
_cell_length_b                    16.4510(5) 
_cell_length_c                    18.7000(6) 
_cell_angle_alpha                 90.00 
_cell_angle_beta                  111.1660(13) 
_cell_angle_gamma                 90.00 
_cell_volume                      4932.0(3) 
_cell_formula_units_Z             4 
_cell_measurement_temperature     230.0(2) 
_cell_measurement_reflns_used     8571 
_cell_measurement_theta_min       1.018 
_cell_measurement_theta_max       25.028 
 
_exptl_crystal_description        'plate' 
_exptl_crystal_colour             'colorless' 
_exptl_crystal_size_max           0.13 
_exptl_crystal_size_mid           0.12 
_exptl_crystal_size_min           0.06 
_exptl_crystal_density_meas       ? 
_exptl_crystal_density_diffrn     1.549 
_exptl_crystal_density_method     'not measured' 
_exptl_crystal_F_000              2280 
_exptl_absorpt_coefficient_mu     3.088 
_exptl_absorpt_correction_type    none 
_exptl_absorpt_correction_T_min   0.6897
_exptl_absorpt_correction_T_max   0.8364
_exptl_absorpt_process_details    ? 
 
_exptl_special_details 
; 
 ? 
; 
 
_diffrn_ambient_temperature       230.0(2) 
_diffrn_radiation_wavelength      0.71073 
_diffrn_radiation_type            MoK\a 
_diffrn_radiation_source          'fine-focus sealed tube' 
_diffrn_radiation_monochromator   graphite 
_diffrn_measurement_device_type   'KappaCCD' 
_diffrn_measurement_method        'CCD' 
_diffrn_detector_area_resol_mean  ? 
_diffrn_standards_number          ? 
_diffrn_standards_interval_count  ? 
_diffrn_standards_interval_time   ? 
_diffrn_standards_decay_%         ? 
_diffrn_reflns_number             15217 
_diffrn_reflns_av_R_equivalents   0.0598 
_diffrn_reflns_av_sigmaI/netI     0.0923 
_diffrn_reflns_limit_h_min        -20 
_diffrn_reflns_limit_h_max        20 
_diffrn_reflns_limit_k_min        -19 
_diffrn_reflns_limit_k_max        17 
_diffrn_reflns_limit_l_min        -22 
_diffrn_reflns_limit_l_max        22 
_diffrn_reflns_theta_min          1.70 
_diffrn_reflns_theta_max          24.98 
_reflns_number_total              8618 
_reflns_number_gt                 5598 
_reflns_threshold_expression      >2sigma(I) 
 
_computing_data_collection        'Nonius (1997), KappaCCD Collect Program' 
_computing_cell_refinement        'HKL Scalepack (Otwinowski & Minor 1997)' 
_computing_data_reduction         
;
HKL Denzo and Scalepack (Otwinowski & Minor 1997)
; 
_computing_structure_solution     
;
S.Mackay, C.J.Gilmore, C.Edwards, M. Tremayne, N. Stuart, K.Shankland 
"maXus": a computer program for the solution and refinement of crystal 
structures from diffraction data University of Glasgow, Scotland, UK, 
Nonius BV, Delft, The Netherlands and MacScience Co. Ltd.,
Yokohama, Japan (1998)
;  
_computing_structure_refinement   'SHELXL-97 (Sheldrick, 1997)' 
_computing_molecular_graphics     
;
Molecular Structure Corporation (1999). 
ORTEP. TEXRAY Structure Analysis Package. 
MSC, 3200 Research Forest Drive, The 
Woodlands,TX 77381, USA.
; 
_computing_publication_material   'SHELXL-97 (Sheldrick, 1997)' 
 
_refine_special_details 
; 
 Refinement of F^2^ against ALL reflections.  The weighted R-factor wR and 
 goodness of fit S are based on F^2^, conventional R-factors R are based 
 on F, with F set to zero for negative F^2^. The threshold expression of 
 F^2^ > 2sigma(F^2^) is used only for calculating R-factors(gt) etc. and is 
 not relevant to the choice of reflections for refinement.  R-factors based 
 on F^2^ are statistically about twice as large as those based on F, and R- 
 factors based on ALL data will be even larger. 
; 
 
_refine_ls_structure_factor_coef  Fsqd  
_refine_ls_matrix_type            full 
_refine_ls_weighting_scheme       calc  
_refine_ls_weighting_details 
 'calc w=1/[\s^2^(Fo^2^)+(0.0671P)^2^+0.0000P] where P=(Fo^2^+2Fc^2^)/3' 
_atom_sites_solution_primary      direct 
_atom_sites_solution_secondary    difmap 
_atom_sites_solution_hydrogens    geom 
_refine_ls_hydrogen_treatment     constr 
_refine_ls_extinction_method      none 
_refine_ls_extinction_coef        ? 
_refine_ls_number_reflns          8618 
_refine_ls_number_parameters      631 
_refine_ls_number_restraints      0 
_refine_ls_R_factor_all           0.0846 
_refine_ls_R_factor_gt            0.0436 
_refine_ls_wR_factor_ref          0.1150 
_refine_ls_wR_factor_gt           0.1044 
_refine_ls_goodness_of_fit_ref    0.892 
_refine_ls_restrained_S_all       0.892 
_refine_ls_shift/su_max           0.001 
_refine_ls_shift/su_mean          0.000 
 
loop_ 
 _atom_site_label 
 _atom_site_type_symbol 
 _atom_site_fract_x 
 _atom_site_fract_y 
 _atom_site_fract_z 
 _atom_site_U_iso_or_equiv 
 _atom_site_adp_type 
 _atom_site_occupancy 
 _atom_site_symmetry_multiplicity 
 _atom_site_calc_flag 
 _atom_site_refinement_flags 
 _atom_site_disorder_assembly 
 _atom_site_disorder_group 
Th1 Th 0.319384(15) 0.056178(17) 0.097733(15) 0.03334(10) Uani 1 1 d . . . 
O1 O 0.2030(3) -0.0198(3) 0.0053(3) 0.0391(12) Uani 1 1 d . . . 
O2 O 0.2611(3) 0.1116(3) -0.0329(2) 0.0321(11) Uani 1 1 d . . . 
O3 O 0.2873(3) 0.2497(3) -0.0670(3) 0.0443(13) Uani 1 1 d . . . 
O4 O 0.3702(3) 0.1457(3) -0.0873(3) 0.0382(12) Uani 1 1 d . . . 
O5 O 0.3771(3) 0.1695(3) 0.0448(3) 0.0351(11) Uani 1 1 d . . . 
O6 O 0.4663(3) 0.0958(3) 0.1719(3) 0.0362(11) Uani 1 1 d . . . 
O7 O 0.5660(3) -0.0162(3) 0.1886(3) 0.0365(11) Uani 1 1 d . . . 
O8 O 0.5448(3) 0.0335(3) 0.2985(3) 0.0419(13) Uani 1 1 d . . . 
O9 O 0.4240(3) -0.0253(3) 0.1941(3) 0.0371(12) Uani 1 1 d . . . 
O10 O 0.2796(3) -0.0827(3) 0.1127(3) 0.0407(12) Uani 1 1 d . . . 
O11 O 0.2198(3) -0.1691(3) -0.0037(3) 0.0480(13) Uani 1 1 d . . . 
O12 O 0.1308(3) -0.1221(3) 0.0567(3) 0.0440(13) Uani 1 1 d . . . 
O13 O 0.4065(3) -0.0403(4) 0.0090(3) 0.0582(16) Uani 1 1 d . . . 
H13O H 0.3637 -0.0584 0.0128 0.070 Uiso 1 1 calc R . . 
C1 C 0.1803(5) 0.1122(5) 0.1229(4) 0.044(2) Uani 1 1 d . . . 
C2 C 0.2280(5) 0.1831(5) 0.1241(5) 0.049(2) Uani 1 1 d . . . 
C3 C 0.3004(5) 0.1795(5) 0.1909(5) 0.049(2) Uani 1 1 d . . . 
C4 C 0.2978(5) 0.1089(5) 0.2308(5) 0.046(2) Uani 1 1 d . . . 
C5 C 0.2232(5) 0.0657(5) 0.1892(4) 0.0389(17) Uani 1 1 d . . . 
C6 C 0.0938(5) 0.0941(7) 0.0666(5) 0.065(3) Uani 1 1 d . . . 
H6A H 0.0758 0.0422 0.0783 0.097 Uiso 1 1 calc R . . 
H6B H 0.0946 0.0930 0.0155 0.097 Uiso 1 1 calc R . . 
H6C H 0.0560 0.1355 0.0700 0.097 Uiso 1 1 calc R . . 
C7 C 0.1994(6) 0.2538(6) 0.0685(6) 0.076(3) Uani 1 1 d . . . 
H7A H 0.2425 0.2942 0.0809 0.115 Uiso 1 1 calc R . . 
H7B H 0.1498 0.2771 0.0723 0.115 Uiso 1 1 calc R . . 
H7C H 0.1876 0.2347 0.0172 0.115 Uiso 1 1 calc R . . 
C8 C 0.3647(6) 0.2471(6) 0.2176(6) 0.077(3) Uani 1 1 d . . . 
H8A H 0.3520 0.2887 0.1791 0.115 Uiso 1 1 calc R . . 
H8B H 0.4192 0.2255 0.2262 0.115 Uiso 1 1 calc R . . 
H8C H 0.3635 0.2699 0.2645 0.115 Uiso 1 1 calc R . . 
C9 C 0.3591(5) 0.0832(6) 0.3095(4) 0.063(3) Uani 1 1 d . . . 
H9A H 0.3424 0.0316 0.3232 0.095 Uiso 1 1 calc R . . 
H9B H 0.3594 0.1232 0.3469 0.095 Uiso 1 1 calc R . . 
H9C H 0.4141 0.0786 0.3077 0.095 Uiso 1 1 calc R . . 
C10 C 0.1910(5) -0.0083(6) 0.2163(5) 0.059(2) Uani 1 1 d . . . 
H10A H 0.1395 -0.0251 0.1777 0.089 Uiso 1 1 calc R . . 
H10B H 0.1818 0.0043 0.2627 0.089 Uiso 1 1 calc R . . 
H10C H 0.2312 -0.0513 0.2257 0.089 Uiso 1 1 calc R . . 
C11 C 0.1624(4) 0.0070(6) -0.0688(4) 0.043(2) Uani 1 1 d . . . 
C12 C 0.0938(5) -0.0335(6) -0.1205(5) 0.052(2) Uani 1 1 d . . . 
H12 H 0.0750 -0.0824 -0.1077 0.063 Uiso 1 1 calc R . . 
C13 C 0.0542(5) 0.0025(7) -0.1931(5) 0.061(3) Uani 1 1 d . . . 
H13 H 0.0085 -0.0231 -0.2290 0.074 Uiso 1 1 calc R . . 
C14 C 0.0819(5) 0.0748(7) -0.2116(5) 0.066(3) Uani 1 1 d . . . 
H14 H 0.0547 0.0977 -0.2597 0.079 Uiso 1 1 calc R . . 
C15 C 0.1516(4) 0.1145(6) -0.1581(4) 0.050(2) Uani 1 1 d . . . 
H15 H 0.1697 0.1644 -0.1696 0.060 Uiso 1 1 calc R . . 
C16 C 0.1910(4) 0.0780(5) -0.0900(4) 0.0399(19) Uani 1 1 d . . . 
C17 C 0.3145(4) 0.2711(5) -0.1250(4) 0.0404(18) Uani 1 1 d . . . 
C18 C 0.2983(5) 0.3403(6) -0.1695(5) 0.052(2) Uani 1 1 d . . . 
H18 H 0.2645 0.3812 -0.1622 0.063 Uiso 1 1 calc R . . 
C19 C 0.3328(5) 0.3477(5) -0.2247(5) 0.054(2) Uani 1 1 d . . . 
H19 H 0.3223 0.3942 -0.2550 0.065 Uiso 1 1 calc R . . 
C20 C 0.3829(5) 0.2875(5) -0.2363(5) 0.055(2) Uani 1 1 d . . . 
H20 H 0.4049 0.2935 -0.2748 0.066 Uiso 1 1 calc R . . 
C21 C 0.4011(5) 0.2170(5) -0.1903(5) 0.047(2) Uani 1 1 d . . . 
H21 H 0.4366 0.1772 -0.1963 0.057 Uiso 1 1 calc R . . 
C22 C 0.3648(4) 0.2092(5) -0.1367(4) 0.0371(17) Uani 1 1 d . . . 
C23 C 0.4587(4) 0.1936(5) 0.0765(4) 0.0382(18) Uani 1 1 d . . . 
C24 C 0.4949(5) 0.2533(5) 0.0465(4) 0.0438(19) Uani 1 1 d . . . 
H24 H 0.4633 0.2808 0.0020 0.053 Uiso 1 1 calc R . . 
C25 C 0.5793(5) 0.2717(5) 0.0837(5) 0.052(2) Uani 1 1 d . . . 
H25 H 0.6044 0.3097 0.0621 0.062 Uiso 1 1 calc R . . 
C26 C 0.6266(5) 0.2344(5) 0.1525(5) 0.058(2) Uani 1 1 d . . . 
H26 H 0.6821 0.2488 0.1776 0.070 Uiso 1 1 calc R . . 
C27 C 0.5897(4) 0.1748(5) 0.1835(4) 0.045(2) Uani 1 1 d . . . 
H27 H 0.6208 0.1493 0.2293 0.055 Uiso 1 1 calc R . . 
C28 C 0.5073(4) 0.1542(5) 0.1462(4) 0.0392(18) Uani 1 1 d . . . 
C29 C 0.6390(4) -0.0222(5) 0.2529(4) 0.0382(18) Uani 1 1 d . . . 
C30 C 0.7149(5) -0.0506(5) 0.2555(5) 0.0479(19) Uani 1 1 d . . . 
H30 H 0.7244 -0.0669 0.2117 0.057 Uiso 1 1 calc R . . 
C31 C 0.7769(5) -0.0536(6) 0.3285(5) 0.051(2) Uani 1 1 d . . . 
H31 H 0.8293 -0.0730 0.3333 0.062 Uiso 1 1 calc R . . 
C32 C 0.7641(5) -0.0293(6) 0.3930(5) 0.056(2) Uani 1 1 d . . . 
H32 H 0.8073 -0.0329 0.4403 0.067 Uiso 1 1 calc R . . 
C33 C 0.6866(5) 0.0011(5) 0.3888(4) 0.047(2) Uani 1 1 d . . . 
H33 H 0.6767 0.0178 0.4323 0.057 Uiso 1 1 calc R . . 
C34 C 0.6255(4) 0.0049(5) 0.3166(4) 0.0418(19) Uani 1 1 d . . . 
C35 C 0.4070(4) -0.1023(4) 0.2139(4) 0.0348(17) Uani 1 1 d . . . 
C36 C 0.4600(5) -0.1472(5) 0.2752(4) 0.046(2) Uani 1 1 d . . . 
H36 H 0.5116 -0.1263 0.3057 0.055 Uiso 1 1 calc R . . 
C37 C 0.4351(5) -0.2229(5) 0.2901(5) 0.050(2) Uani 1 1 d . . . 
H37 H 0.4698 -0.2528 0.3317 0.060 Uiso 1 1 calc R . . 
C38 C 0.3595(5) -0.2549(5) 0.2442(5) 0.052(2) Uani 1 1 d . . . 
H38 H 0.3447 -0.3069 0.2539 0.062 Uiso 1 1 calc R . . 
C39 C 0.3051(5) -0.2107(5) 0.1837(4) 0.0447(19) Uani 1 1 d . . . 
H39 H 0.2533 -0.2317 0.1539 0.054 Uiso 1 1 calc R . . 
C40 C 0.3299(4) -0.1352(5) 0.1689(4) 0.0389(18) Uani 1 1 d . . . 
C41 C 0.1617(5) -0.2273(5) -0.0051(5) 0.047(2) Uani 1 1 d . . . 
C42 C 0.1533(6) -0.3039(6) -0.0385(5) 0.061(2) Uani 1 1 d . . . 
H42 H 0.1873 -0.3217 -0.0643 0.073 Uiso 1 1 calc R . . 
C43 C 0.0899(6) -0.3523(6) -0.0305(5) 0.065(3) Uani 1 1 d . . . 
H43 H 0.0826 -0.4046 -0.0508 0.078 Uiso 1 1 calc R . . 
C44 C 0.0388(6) -0.3267(5) 0.0053(5) 0.062(3) Uani 1 1 d . . . 
H44 H -0.0024 -0.3611 0.0093 0.074 Uiso 1 1 calc R . . 
C45 C 0.0480(5) -0.2470(6) 0.0370(5) 0.059(2) Uani 1 1 d . . . 
H45 H 0.0130 -0.2282 0.0615 0.071 Uiso 1 1 calc R . . 
C46 C 0.1100(5) -0.1990(5) 0.0302(5) 0.045(2) Uani 1 1 d . . . 
C47 C 0.4596(8) -0.5151(10) 0.0826(6) 0.092(4) Uani 1 1 d . . . 
H47 H 0.5026 -0.5448 0.0761 0.110 Uiso 1 1 calc R . . 
C48 C 0.4687(8) -0.4335(11) 0.0921(6) 0.100(5) Uani 1 1 d . . . 
H48 H 0.5166 -0.4068 0.0927 0.120 Uiso 1 1 calc R . . 
C49 C 0.4038(10) -0.3931(8) 0.1006(6) 0.091(4) Uani 1 1 d . . . 
H49 H 0.4077 -0.3369 0.1060 0.110 Uiso 1 1 calc R . . 
C50 C 0.3354(9) -0.4288(9) 0.1018(6) 0.087(4) Uani 1 1 d . . . 
H50 H 0.2924 -0.3988 0.1080 0.105 Uiso 1 1 calc R . . 
C51 C 0.3302(7) -0.5109(9) 0.0935(6) 0.082(3) Uani 1 1 d . . . 
H51 H 0.2833 -0.5376 0.0956 0.098 Uiso 1 1 calc R . . 
C52 C 0.3914(10) -0.5550(8) 0.0823(7) 0.094(4) Uani 1 1 d . . . 
H52 H 0.3863 -0.6109 0.0746 0.113 Uiso 1 1 calc R . . 
B1 B 0.3235(5) 0.1714(6) -0.0393(5) 0.040(2) Uani 1 1 d . . . 
B2 B 0.5040(5) 0.0206(5) 0.2151(5) 0.0357(19) Uani 1 1 d . . . 
B3 B 0.2047(5) -0.1041(6) 0.0403(5) 0.047(2) Uani 1 1 d . . . 
Li1 Li 0.5581(8) -0.0499(9) 0.0836(7) 0.045(3) Uani 1 1 d . . . 
 
loop_ 
 _atom_site_aniso_label 
 _atom_site_aniso_U_11 
 _atom_site_aniso_U_22 
 _atom_site_aniso_U_33 
 _atom_site_aniso_U_23 
 _atom_site_aniso_U_13 
 _atom_site_aniso_U_12 
Th1 0.02916(14) 0.03543(15) 0.03523(15) -0.00160(15) 0.01138(10) 0.00054(14) 
O1 0.036(3) 0.035(3) 0.044(3) -0.005(2) 0.010(2) -0.002(2) 
O2 0.028(2) 0.036(3) 0.029(2) 0.004(2) 0.006(2) -0.002(2) 
O3 0.042(3) 0.042(3) 0.051(3) 0.008(3) 0.020(2) 0.011(2) 
O4 0.042(3) 0.037(3) 0.040(3) 0.003(2) 0.020(2) 0.004(2) 
O5 0.033(3) 0.036(3) 0.033(2) 0.003(2) 0.008(2) 0.001(2) 
O6 0.028(2) 0.036(3) 0.040(3) 0.005(2) 0.008(2) 0.002(2) 
O7 0.034(3) 0.038(3) 0.036(3) 0.002(2) 0.010(2) 0.000(2) 
O8 0.036(3) 0.053(4) 0.033(3) -0.001(2) 0.009(2) 0.001(2) 
O9 0.032(3) 0.038(3) 0.040(3) 0.003(2) 0.011(2) -0.001(2) 
O10 0.035(3) 0.043(3) 0.041(3) 0.003(2) 0.010(2) -0.008(2) 
O11 0.043(3) 0.046(3) 0.054(3) -0.012(3) 0.016(2) -0.005(3) 
O12 0.037(3) 0.040(3) 0.057(3) -0.010(3) 0.018(2) -0.007(2) 
O13 0.047(3) 0.072(5) 0.059(3) 0.004(3) 0.024(3) -0.003(3) 
C1 0.043(4) 0.051(5) 0.044(4) -0.012(4) 0.022(4) 0.003(4) 
C2 0.054(5) 0.045(5) 0.061(5) 0.004(4) 0.037(4) 0.008(4) 
C3 0.049(5) 0.048(5) 0.052(5) -0.025(4) 0.023(4) -0.003(4) 
C4 0.051(5) 0.050(5) 0.048(5) -0.011(4) 0.029(4) 0.002(4) 
C5 0.045(4) 0.035(4) 0.037(4) 0.002(4) 0.015(3) 0.004(4) 
C6 0.040(5) 0.094(8) 0.061(6) 0.005(5) 0.019(4) 0.013(5) 
C7 0.093(8) 0.066(7) 0.090(8) 0.010(6) 0.057(6) 0.017(6) 
C8 0.078(7) 0.072(7) 0.098(8) -0.045(6) 0.053(6) -0.028(6) 
C9 0.055(5) 0.097(8) 0.037(4) -0.018(5) 0.016(4) 0.006(5) 
C10 0.062(6) 0.075(7) 0.050(5) 0.002(5) 0.031(4) -0.002(5) 
C11 0.025(4) 0.066(6) 0.036(4) -0.005(4) 0.006(3) 0.004(4) 
C12 0.041(4) 0.066(6) 0.051(5) -0.006(4) 0.018(4) -0.008(4) 
C13 0.035(4) 0.097(8) 0.044(5) -0.015(5) 0.005(4) -0.010(5) 
C14 0.039(5) 0.104(9) 0.052(5) 0.004(5) 0.014(4) 0.003(5) 
C15 0.033(4) 0.071(6) 0.043(4) 0.004(4) 0.010(4) 0.003(4) 
C16 0.025(4) 0.052(5) 0.042(4) -0.010(4) 0.010(3) -0.001(3) 
C17 0.033(4) 0.040(5) 0.043(4) 0.008(4) 0.007(3) 0.002(3) 
C18 0.037(4) 0.050(5) 0.064(5) 0.010(5) 0.011(4) 0.006(4) 
C19 0.052(5) 0.044(5) 0.069(6) 0.022(5) 0.024(4) 0.001(4) 
C20 0.063(6) 0.049(5) 0.064(6) 0.009(5) 0.037(5) -0.002(4) 
C21 0.057(5) 0.038(5) 0.056(5) 0.002(4) 0.031(4) 0.005(4) 
C22 0.039(4) 0.036(4) 0.034(4) 0.005(3) 0.009(3) 0.006(3) 
C23 0.033(4) 0.042(5) 0.040(4) 0.000(4) 0.013(3) 0.005(3) 
C24 0.039(4) 0.040(5) 0.047(4) 0.000(4) 0.009(3) -0.010(4) 
C25 0.045(5) 0.053(5) 0.054(5) 0.006(4) 0.013(4) -0.015(4) 
C26 0.047(5) 0.054(6) 0.064(6) 0.008(5) 0.007(4) -0.018(4) 
C27 0.036(4) 0.045(5) 0.045(4) -0.002(4) 0.002(3) -0.002(4) 
C28 0.038(4) 0.039(5) 0.041(4) 0.001(4) 0.016(3) -0.003(4) 
C29 0.036(4) 0.034(4) 0.035(4) 0.005(3) 0.001(3) -0.001(3) 
C30 0.037(4) 0.047(5) 0.052(5) 0.001(4) 0.007(3) 0.004(4) 
C31 0.034(4) 0.055(5) 0.057(5) 0.001(5) 0.007(4) 0.005(4) 
C32 0.041(5) 0.068(6) 0.044(5) 0.012(4) -0.001(4) 0.001(4) 
C33 0.053(5) 0.053(5) 0.035(4) 0.008(4) 0.014(4) -0.008(4) 
C34 0.038(4) 0.048(5) 0.036(4) 0.007(4) 0.009(3) -0.004(4) 
C35 0.036(4) 0.032(4) 0.040(4) 0.008(3) 0.018(3) 0.001(3) 
C36 0.041(4) 0.056(5) 0.040(4) 0.003(4) 0.015(3) -0.003(4) 
C37 0.061(5) 0.047(5) 0.047(5) 0.019(4) 0.025(4) 0.006(4) 
C38 0.055(5) 0.042(5) 0.066(6) 0.006(4) 0.031(4) -0.007(4) 
C39 0.044(4) 0.041(5) 0.050(5) -0.006(4) 0.018(4) -0.008(4) 
C40 0.034(4) 0.046(5) 0.040(4) -0.002(4) 0.018(3) -0.003(4) 
C41 0.044(5) 0.039(5) 0.049(5) 0.001(4) 0.005(4) -0.002(4) 
C42 0.060(6) 0.056(6) 0.057(5) -0.004(5) 0.008(4) -0.002(5) 
C43 0.078(7) 0.045(6) 0.062(6) -0.015(5) 0.013(5) -0.005(5) 
C44 0.062(6) 0.038(5) 0.063(6) 0.010(5) -0.004(5) -0.019(5) 
C45 0.044(5) 0.064(6) 0.060(5) 0.010(5) 0.009(4) -0.004(4) 
C46 0.038(4) 0.044(5) 0.050(5) 0.000(4) 0.011(4) -0.001(4) 
C47 0.076(8) 0.129(12) 0.058(7) 0.034(8) 0.010(6) 0.020(8) 
C48 0.080(8) 0.151(15) 0.056(6) -0.010(8) 0.011(6) -0.053(10) 
C49 0.130(12) 0.079(9) 0.070(7) -0.001(6) 0.043(8) 0.007(9) 
C50 0.103(10) 0.101(11) 0.068(7) -0.003(7) 0.043(7) 0.020(8) 
C51 0.079(8) 0.104(10) 0.065(7) 0.000(7) 0.030(6) -0.003(7) 
C52 0.144(12) 0.059(7) 0.086(8) 0.016(7) 0.050(8) 0.017(9) 
B1 0.038(5) 0.040(5) 0.046(5) -0.005(4) 0.018(4) 0.001(4) 
B2 0.037(5) 0.036(5) 0.035(4) 0.004(4) 0.013(4) 0.004(4) 
B3 0.036(5) 0.051(6) 0.050(6) -0.012(5) 0.010(4) 0.001(4) 
Li1 0.044(7) 0.055(8) 0.037(6) 0.007(7) 0.014(5) -0.006(7) 
 
_geom_special_details 
; 
 All esds (except the esd in the dihedral angle between two l.s. planes) 
 are estimated using the full covariance matrix.  The cell esds are taken 
 into account individually in the estimation of esds in distances, angles 
 and torsion angles; correlations between esds in cell parameters are only 
 used when they are defined by crystal symmetry.  An approximate (isotropic) 
 treatment of cell esds is used for estimating esds involving l.s. planes. 
; 
 
loop_ 
 _geom_bond_atom_site_label_1 
 _geom_bond_atom_site_label_2 
 _geom_bond_distance 
 _geom_bond_site_symmetry_2 
 _geom_bond_publ_flag 
Th1 O10 2.430(5) . ? 
Th1 O9 2.437(5) . ? 
Th1 O2 2.456(4) . ? 
Th1 O1 2.461(5) . ? 
Th1 O5 2.481(5) . ? 
Th1 O6 2.490(4) . ? 
Th1 C1 2.758(7) . ? 
Th1 C2 2.762(8) . ? 
Th1 C3 2.769(7) . ? 
Th1 C5 2.780(7) . ? 
Th1 C4 2.782(7) . ? 
O1 C11 1.380(9) . ? 
O1 B3 1.530(12) . ? 
O2 C16 1.403(8) . ? 
O2 B1 1.492(10) . ? 
O3 C17 1.375(9) . ? 
O3 B1 1.442(10) . ? 
O4 C22 1.376(9) . ? 
O4 B1 1.467(10) . ? 
O4 Li1 1.987(15) 3_655 ? 
O5 C23 1.370(8) . ? 
O5 B1 1.509(10) . ? 
O6 C28 1.376(9) . ? 
O6 B2 1.492(10) . ? 
O7 C29 1.393(8) . ? 
O7 B2 1.459(10) . ? 
O7 Li1 1.998(13) . ? 
O8 C34 1.385(9) . ? 
O8 B2 1.476(9) . ? 
O9 C35 1.380(8) . ? 
O9 B2 1.492(10) . ? 
O10 C40 1.394(9) . ? 
O10 B3 1.535(10) . ? 
O11 C41 1.376(9) . ? 
O11 B3 1.430(11) . ? 
O12 C46 1.358(9) . ? 
O12 B3 1.440(10) . ? 
O13 Li1 2.478(13) . ? 
O13 Li1 2.517(14) 3_655 ? 
O13 H13O 0.8200 . ?
C1 C5 1.416(11) . ? 
C1 C2 1.422(11) . ? 
C1 C6 1.509(11) . ? 
C2 C3 1.409(11) . ? 
C2 C7 1.519(12) . ? 
C3 C4 1.390(12) . ? 
C3 C8 1.521(11) . ? 
C4 C5 1.427(11) . ? 
C4 C9 1.528(11) . ? 
C5 C10 1.497(11) . ? 
C6 H6A 0.9600 . ? 
C6 H6B 0.9600 . ? 
C6 H6C 0.9600 . ? 
C7 H7A 0.9600 . ? 
C7 H7B 0.9600 . ? 
C7 H7C 0.9600 . ? 
C8 H8A 0.9600 . ? 
C8 H8B 0.9600 . ? 
C8 H8C 0.9600 . ? 
C9 H9A 0.9600 . ? 
C9 H9B 0.9600 . ? 
C9 H9C 0.9600 . ? 
C10 H10A 0.9600 . ? 
C10 H10B 0.9600 . ? 
C10 H10C 0.9600 . ? 
C11 C16 1.379(11) . ? 
C11 C12 1.395(11) . ? 
C12 C13 1.410(12) . ? 
C12 H12 0.9300 . ? 
C13 C14 1.371(14) . ? 
C13 H13 0.9300 . ? 
C14 C15 1.413(12) . ? 
C14 H14 0.9300 . ? 
C15 C16 1.349(10) . ? 
C15 H15 0.9300 . ?
C17 C18 1.379(11) . ? 
C17 C22 1.402(10) . ? 
C18 C19 1.369(11) . ? 
C18 H18 0.9300 . ? 
C19 C20 1.379(12) . ? 
C19 H19 0.9300 . ? 
C20 C21 1.411(11) . ? 
C20 H20 0.9300 . ? 
C21 C22 1.365(10) . ? 
C21 H21 0.9300 . ? 
C23 C24 1.384(10) . ? 
C23 C28 1.425(10) . ? 
C24 C25 1.398(10) . ? 
C24 H24 0.9300 . ? 
C25 C26 1.393(11) . ? 
C25 H25 0.9300 . ? 
C26 C27 1.402(11) . ? 
C26 H26 0.9300 . ? 
C27 C28 1.377(10) . ? 
C27 H27 0.9300 . ? 
C29 C34 1.368(10) . ? 
C29 C30 1.370(11) . ? 
C30 C31 1.397(11) . ? 
C30 H30 0.9300 . ? 
C31 C32 1.361(12) . ? 
C31 H31 0.9300 . ?
C32 C33 1.399(11) . ? 
C32 H32 0.9300 . ?
C33 C34 1.381(10) . ? 
C33 H33 0.9300 . ?
C35 C36 1.390(10) . ? 
C35 C40 1.397(10) . ? 
C36 C37 1.379(11) . ? 
C36 H36 0.9300 . ? 
C37 C38 1.378(11) . ? 
C37 H37 0.9300 . ? 
C38 C39 1.384(11) . ? 
C38 H38 0.9300 . ? 
C39 C40 1.374(10) . ? 
C39 H39 0.9300 . ? 
C41 C46 1.366(11) . ? 
C41 C42 1.390(12) . ? 
C42 C43 1.402(13) . ? 
C42 H42 0.9300 . ? 
C43 C44 1.349(13) . ? 
C43 H43 0.9300 . ? 
C44 C45 1.424(13) . ? 
C44 H44 0.9300 . ? 
C45 C46 1.369(11) . ? 
C45 H45 0.9300 . ? 
C47 C52 1.341(17) . ? 
C47 C48 1.356(18) . ? 
C47 H47 0.9300 . ? 
C48 C49 1.357(18) . ? 
C48 H48 0.9300 . ? 
C49 C50 1.321(16) . ? 
C49 H49 0.9300 . ? 
C50 C51 1.359(17) . ? 
C50 H50 0.9300 . ?
C51 C52 1.357(16) . ? 
C51 H51 0.9300 . ? 
C52 H52 0.9300 . ? 
Li1 O4 1.987(15) 3_655 ? 
Li1 O13 2.517(14) 3_655 ? 
Li1 Li1 3.46(2) 3_655 ? 
 
loop_ 
 _geom_angle_atom_site_label_1 
 _geom_angle_atom_site_label_2 
 _geom_angle_atom_site_label_3 
 _geom_angle 
 _geom_angle_site_symmetry_1 
 _geom_angle_site_symmetry_3 
 _geom_angle_publ_flag 
O10 Th1 O9 63.96(16) . . ? 
O10 Th1 O2 115.64(15) . . ? 
O9 Th1 O2 150.05(16) . . ? 
O10 Th1 O1 54.00(16) . . ? 
O9 Th1 O1 115.85(16) . . ? 
O2 Th1 O1 63.47(16) . . ? 
O10 Th1 O5 157.33(17) . . ? 
O9 Th1 O5 114.42(15) . . ? 
O2 Th1 O5 53.32(14) . . ? 
O1 Th1 O5 116.26(16) . . ? 
O10 Th1 O6 116.95(16) . . ? 
O9 Th1 O6 53.31(16) . . ? 
O2 Th1 O6 115.12(15) . . ? 
O1 Th1 O6 158.18(16) . . ? 
O5 Th1 O6 63.50(15) . . ? 
O10 Th1 C1 89.8(2) . . ? 
O9 Th1 C1 120.8(2) . . ? 
O2 Th1 C1 88.7(2) . . ? 
O1 Th1 C1 75.8(2) . . ? 
O5 Th1 C1 108.3(2) . . ? 
O6 Th1 C1 125.8(2) . . ? 
O10 Th1 C2 119.2(2) . . ? 
O9 Th1 C2 126.8(2) . . ? 
O2 Th1 C2 81.0(2) . . ? 
O1 Th1 C2 98.0(2) . . ? 
O5 Th1 C2 80.7(2) . . ? 
O6 Th1 C2 103.3(2) . . ? 
C1 Th1 C2 29.9(2) . . ? 
O10 Th1 C3 121.0(2) . . ? 
O9 Th1 C3 99.3(2) . . ? 
O2 Th1 C3 104.8(2) . . ? 
O1 Th1 C3 124.3(2) . . ? 
O5 Th1 C3 81.7(2) . . ? 
O6 Th1 C3 77.5(2) . . ? 
C1 Th1 C3 48.8(2) . . ? 
C2 Th1 C3 29.5(2) . . ? 
O10 Th1 C5 74.2(2) . . ? 
O9 Th1 C5 91.18(19) . . ? 
O2 Th1 C5 118.10(18) . . ? 
O1 Th1 C5 86.98(19) . . ? 
O5 Th1 C5 128.03(19) . . ? 
O6 Th1 C5 110.60(19) . . ? 
C1 Th1 C5 29.6(2) . . ? 
C2 Th1 C5 49.0(2) . . ? 
C3 Th1 C5 48.7(2) . . ? 
O10 Th1 C4 93.2(2) . . ? 
O9 Th1 C4 79.1(2) . . ? 
O2 Th1 C4 129.4(2) . . ? 
O1 Th1 C4 116.7(2) . . ? 
O5 Th1 C4 108.9(2) . . ? 
O6 Th1 C4 81.7(2) . . ? 
C1 Th1 C4 48.7(2) . . ? 
C2 Th1 C4 48.5(2) . . ? 
C3 Th1 C4 29.0(2) . . ? 
C5 Th1 C4 29.7(2) . . ? 
C11 O1 B3 130.1(6) . . ? 
C11 O1 Th1 122.1(5) . . ? 
B3 O1 Th1 105.9(4) . . ? 
C16 O2 B1 130.0(6) . . ? 
C16 O2 Th1 122.7(4) . . ? 
B1 O2 Th1 106.1(4) . . ? 
C17 O3 B1 106.6(6) . . ? 
C22 O4 B1 105.8(6) . . ? 
C22 O4 Li1 121.0(6) . 3_655 ? 
B1 O4 Li1 132.7(6) . 3_655 ? 
C23 O5 B1 126.2(6) . . ? 
C23 O5 Th1 122.7(4) . . ? 
B1 O5 Th1 104.4(4) . . ? 
C28 O6 B2 126.2(5) . . ? 
C28 O6 Th1 122.1(4) . . ? 
B2 O6 Th1 103.9(4) . . ? 
C29 O7 B2 106.1(6) . . ? 
C29 O7 Li1 123.3(6) . . ? 
B2 O7 Li1 130.6(6) . . ? 
C34 O8 B2 105.1(5) . . ? 
C35 O9 B2 131.2(6) . . ? 
C35 O9 Th1 122.1(4) . . ? 
B2 O9 Th1 106.3(4) . . ? 
C40 O10 B3 128.2(6) . . ? 
C40 O10 Th1 123.0(4) . . ? 
B3 O10 Th1 107.2(5) . . ? 
C41 O11 B3 104.5(6) . . ? 
C46 O12 B3 104.5(6) . . ? 
Li1 O13 Li1 87.7(4) . 3_655 ? 
Li1 O13 H13O 136.2 . . ? 
Li1 O13 H13O 136.2 3_655 . ? 
C5 C1 C2 108.3(7) . . ? 
C5 C1 C6 125.1(8) . . ? 
C2 C1 C6 126.2(8) . . ? 
C5 C1 Th1 76.1(4) . . ? 
C2 C1 Th1 75.2(4) . . ? 
C6 C1 Th1 120.7(5) . . ? 
C3 C2 C1 107.5(7) . . ? 
C3 C2 C7 127.1(8) . . ? 
C1 C2 C7 125.0(8) . . ? 
C3 C2 Th1 75.5(5) . . ? 
C1 C2 Th1 74.9(4) . . ? 
C7 C2 Th1 121.4(5) . . ? 
C4 C3 C2 108.8(7) . . ? 
C4 C3 C8 126.5(8) . . ? 
C2 C3 C8 124.4(9) . . ? 
C4 C3 Th1 76.1(4) . . ? 
C2 C3 Th1 75.0(4) . . ? 
C8 C3 Th1 120.4(5) . . ? 
C3 C4 C5 108.7(7) . . ? 
C3 C4 C9 127.2(8) . . ? 
C5 C4 C9 123.9(8) . . ? 
C3 C4 Th1 75.0(4) . . ? 
C5 C4 Th1 75.0(4) . . ? 
C9 C4 Th1 120.5(5) . . ? 
C1 C5 C4 106.8(7) . . ? 
C1 C5 C10 126.6(7) . . ? 
C4 C5 C10 126.1(7) . . ? 
C1 C5 Th1 74.3(4) . . ? 
C4 C5 Th1 75.2(4) . . ? 
C10 C5 Th1 122.4(5) . . ? 
C1 C6 H6A 109.5 . . ? 
C1 C6 H6B 109.5 . . ? 
H6A C6 H6B 109.5 . . ? 
C1 C6 H6C 109.5 . . ? 
H6A C6 H6C 109.5 . . ? 
H6B C6 H6C 109.5 . . ? 
C2 C7 H7A 109.5 . . ? 
C2 C7 H7B 109.5 . . ? 
H7A C7 H7B 109.5 . . ? 
C2 C7 H7C 109.5 . . ? 
H7A C7 H7C 109.5 . . ? 
H7B C7 H7C 109.5 . . ? 
C3 C8 H8A 109.5 . . ? 
C3 C8 H8B 109.5 . . ? 
H8A C8 H8B 109.5 . . ? 
C3 C8 H8C 109.5 . . ? 
H8A C8 H8C 109.5 . . ? 
H8B C8 H8C 109.5 . . ? 
C4 C9 H9A 109.5 . . ? 
C4 C9 H9B 109.5 . . ? 
H9A C9 H9B 109.5 . . ? 
C4 C9 H9C 109.5 . . ? 
H9A C9 H9C 109.5 . . ? 
H9B C9 H9C 109.5 . . ? 
C5 C10 H10A 109.5 . . ? 
C5 C10 H10B 109.5 . . ? 
H10A C10 H10B 109.5 . . ? 
C5 C10 H10C 109.5 . . ? 
H10A C10 H10C 109.5 . . ? 
H10B C10 H10C 109.5 . . ? 
C16 C11 O1 117.1(6) . . ? 
C16 C11 C12 120.4(7) . . ? 
O1 C11 C12 122.5(8) . . ? 
C11 C12 C13 117.3(8) . . ? 
C11 C12 H12 121.3 . . ? 
C13 C12 H12 121.3 . . ? 
C14 C13 C12 121.1(8) . . ? 
C14 C13 H13 119.4 . . ? 
C12 C13 H13 119.4 . . ? 
C13 C14 C15 120.3(8) . . ? 
C13 C14 H14 119.8 . . ? 
C15 C14 H14 119.8 . . ? 
C16 C15 C14 118.1(9) . . ? 
C16 C15 H15 121.0 . . ? 
C14 C15 H15 121.0 . . ? 
C15 C16 C11 122.6(7) . . ? 
C15 C16 O2 123.0(7) . . ? 
C11 C16 O2 114.3(6) . . ? 
O3 C17 C18 129.5(7) . . ? 
O3 C17 C22 110.0(6) . . ? 
C18 C17 C22 120.5(7) . . ? 
C19 C18 C17 118.6(8) . . ? 
C19 C18 H18 120.7 . . ? 
C17 C18 H18 120.7 . . ? 
C18 C19 C20 121.4(8) . . ? 
C19 C20 C21 120.4(8) . . ? 
C19 C20 H20 119.8 . . ? 
C21 C20 H20 119.8 . . ? 
C22 C21 C20 117.8(7) . . ? 
C22 C21 H21 121.1 . . ? 
C20 C21 H21 121.1 . . ? 
C21 C22 O4 128.9(7) . . ? 
C21 C22 C17 121.1(7) . . ? 
O4 C22 C17 110.1(6) . . ? 
O5 C23 C24 124.7(6) . . ? 
O5 C23 C28 115.7(6) . . ? 
C24 C23 C28 119.6(7) . . ? 
C23 C24 C25 119.3(7) . . ? 
C23 C24 H24 120.3 . . ? 
C25 C24 H24 120.3 . . ? 
C26 C25 C24 121.3(8) . . ? 
C26 C25 H25 119.4 . . ? 
C24 C25 H25 119.4 . . ? 
C25 C26 C27 119.4(7) . . ? 
C25 C26 H26 120.3 . . ? 
C27 C26 H26 120.3 . . ? 
C28 C27 C26 119.9(7) . . ? 
C28 C27 H27 120.0 . . ? 
C26 C27 H27 120.0 . . ? 
O6 C28 C27 123.9(7) . . ? 
O6 C28 C23 115.7(6) . . ? 
C27 C28 C23 120.4(7) . . ? 
C34 C29 C30 122.6(7) . . ? 
C34 C29 O7 110.1(6) . . ? 
C30 C29 O7 127.2(7) . . ? 
C29 C30 C31 115.3(8) . . ? 
C29 C30 H30 122.4 . . ? 
C31 C30 H30 122.4 . . ? 
C32 C31 C30 123.0(8) . . ? 
C32 C31 H31 118.5 . . ? 
C30 C31 H31 118.5 . . ? 
C31 C32 C33 120.7(7) . . ? 
C31 C32 H32 119.6 . . ? 
C33 C32 H32 119.6 . . ? 
C34 C33 C32 116.3(8) . . ? 
C34 C33 H33 121.8 . . ? 
C32 C33 H33 121.8 . . ? 
C29 C34 C33 121.9(7) . . ? 
C29 C34 O8 111.6(6) . . ? 
C33 C34 O8 126.5(7) . . ? 
O9 C35 C36 124.7(7) . . ? 
O9 C35 C40 116.1(6) . . ? 
C36 C35 C40 119.1(7) . . ? 
C37 C36 C35 119.3(7) . . ? 
C37 C36 H36 120.4 . . ? 
C35 C36 H36 120.4 . . ? 
C36 C37 C38 120.6(8) . . ? 
C36 C37 H37 119.7 . . ? 
C38 C37 H37 119.7 . . ? 
C37 C38 C39 121.1(8) . . ? 
C37 C38 H38 119.4 . . ? 
C39 C38 H38 119.4 . . ? 
C40 C39 C38 118.1(7) . . ? 
C40 C39 H39 120.9 . . ? 
C38 C39 H39 120.9 . . ? 
C39 C40 O10 124.0(7) . . ? 
C39 C40 C35 121.7(7) . . ? 
O10 C40 C35 114.2(6) . . ? 
C46 C41 O11 110.4(7) . . ? 
C46 C41 C42 123.1(8) . . ? 
O11 C41 C42 126.5(8) . . ? 
C41 C42 C43 115.2(9) . . ? 
C41 C42 H42 122.4 . . ? 
C43 C42 H42 122.4 . . ? 
C44 C43 C42 123.1(9) . . ? 
C44 C43 H43 118.5 . . ? 
C42 C43 H43 118.5 . . ? 
C43 C44 C45 120.0(9) . . ? 
C43 C44 H44 120.0 . . ? 
C45 C44 H44 120.0 . . ? 
C46 C45 C44 117.7(9) . . ? 
C46 C45 H45 121.1 . . ? 
C44 C45 H45 121.1 . . ? 
O12 C46 C41 111.3(7) . . ? 
O12 C46 C45 127.9(8) . . ? 
C41 C46 C45 120.8(8) . . ? 
C52 C47 C48 123.0(14) . . ? 
C52 C47 H47 118.5 . . ? 
C48 C47 H47 118.5 . . ? 
C49 C48 C47 116.0(12) . . ? 
C49 C48 H48 122.0 . . ? 
C47 C48 H48 122.0 . . ? 
C50 C49 C48 124.0(14) . . ? 
C50 C49 H49 118.0 . . ? 
C48 C49 H49 118.0 . . ? 
C49 C50 C51 117.6(12) . . ? 
C49 C50 H50 121.2 . . ? 
C51 C50 H50 121.2 . . ? 
C50 C51 C52 121.8(13) . . ? 
C50 C51 H51 119.1 . . ? 
C52 C51 H51 119.1 . . ? 
C47 C52 C51 117.6(13) . . ? 
C47 C52 H52 121.2 . . ? 
C51 C52 H52 121.2 . . ? 
O3 B1 O4 107.4(7) . . ? 
O3 B1 O2 112.9(6) . . ? 
O4 B1 O2 115.2(7) . . ? 
O3 B1 O5 114.5(7) . . ? 
O4 B1 O5 111.6(6) . . ? 
O2 B1 O5 95.2(6) . . ? 
O7 B2 O8 106.9(6) . . ? 
O7 B2 O6 112.8(6) . . ? 
O8 B2 O6 113.6(6) . . ? 
O7 B2 O9 114.6(6) . . ? 
O8 B2 O9 113.2(6) . . ? 
O6 B2 O9 95.6(5) . . ? 
O11 B3 O12 109.0(7) . . ? 
O11 B3 O1 114.3(7) . . ? 
O12 B3 O1 113.3(7) . . ? 
O11 B3 O10 114.2(7) . . ? 
O12 B3 O10 112.5(7) . . ? 
O1 B3 O10 92.9(6) . . ? 
O4 Li1 O7 111.4(6) 3_655 . ? 
O4 Li1 O13 125.7(7) 3_655 . ? 
O7 Li1 O13 102.7(6) . . ? 
O4 Li1 O13 100.9(5) 3_655 3_655 ? 
O7 Li1 O13 124.4(7) . 3_655 ? 
O13 Li1 O13 92.3(4) . 3_655 ? 
O4 Li1 Li1 123.8(7) 3_655 3_655 ? 
O7 Li1 Li1 124.7(8) . 3_655 ? 
O13 Li1 Li1 46.6(3) . 3_655 ? 
O13 Li1 Li1 45.7(3) 3_655 3_655 ? 
 
_diffrn_measured_fraction_theta_max    0.993 
_diffrn_reflns_theta_full              24.98 
_diffrn_measured_fraction_theta_full   0.993 
_refine_diff_density_max    0.917 
_refine_diff_density_min   -1.007 
_refine_diff_density_rms    0.116 
